# Supplementary material
Source: publisher figshare collection journal article supplement (https://asha.figshare.com/articles/dataset/_/27214407)
Supplement: Supplementary file 2 [file 2]

### Supplemental Material S3. COREQ Checklist.

| Item                                           | Guide questions/description                                           | Location                 |
|------------------------------------------------|-----------------------------------------------------------------------|--------------------------|
| <b>Domain 1: Research team and reflexivity</b> |                                                                       |                          |
| 1. Interviewer/facilitator                     | Which author/s conducted the interview?                               | Page 3055                |
| 2. Credentials                                 | What were the researcher's credentials?                               | Supplemental Material S2 |
| 3. Occupation                                  | What was their occupation at the time of the study?                   | Supplemental Material S2 |
| 4. Gender                                      | Was the researcher male or female?                                    | Supplemental Material S2 |
| 5. Experience and training                     | What experience or training did the researcher have?                  | Supplemental Material S2 |
| 6. Relationship with participants established  | Was a relationship established prior to study commencement?           | Supplemental Material S2 |
| 7. Participant knowledge of the interviewer    | What did the participants know about the researcher?                  | Supplemental Material S2 |
| 8. Interviewer characteristics                 | What characteristics were reported about the interviewer/facilitator? | Supplemental Material S2 |
| <b>Domain 2: Study design</b>                  |                                                                       |                          |
| 9. Methodological orientation and theory       | What methodological orientation was stated to underpin the study?     | Page 3055                |
| 10. Sampling                                   | How were participants selected?                                       | Pages 3053–3055          |
| 11. Method of approach                         | How were participants approached?                                     | Pages 3053–3055          |
| 12. Sample size                                | How many participants were in the study?                              | Pages 3053–3055          |
| 13. Non-participation                          | How many people refused to participate or dropped out? Reasons?       | N/A                      |
| 14. Setting of data collection                 | Where was the data collected?                                         | Page 3055                |
| 15. Presence of non-participants               | Was anyone else present besides the participants and researchers?     | N/A                      |
| 16. Description of sample                      | What are the important characteristics of the sample?                 | Table 1                  |
| 17. Interview guide                            | Were questions, prompts, guides provided by the authors?              | Appendix                 |
| 18. Repeat interviews                          | Were repeat interviews carried out?                                   | N/A                      |
| 19. Audio and visual recording                 | Did the research use audio or visual recording to collect the data?   | Page 3055                |
| 20. Field notes                                | Were field notes made during and/or after the interview?              | Page 3055                |
| 21. Discussion                                 | What was the duration of the interviews?                              | Page 3055                |
| 22. Data saturation                            | Was data saturation discussed?                                        | Pages 3055–3056          |

|                                    |                                                                                                         |                                   |
|------------------------------------|---------------------------------------------------------------------------------------------------------|-----------------------------------|
| 23. Transcripts returned           | Were transcripts returned to participants for comment and/or correction?                                | Page 3056                         |
| Domain 3: Analysis and findings    |                                                                                                         |                                   |
| 24. Number of data coders          | How many data coders coded the data?                                                                    | Page 3055                         |
| 25. Description of the coding tree | Did authors provide a description of the coding tree?                                                   | Supplemental Material S1, Table 2 |
| 26. Derivation of themes           | Were themes identified in advance or derived from the data?                                             | Pages 3055–3056                   |
| 27. Software                       | What software, if applicable, was used to manage the data?                                              | Page 3055                         |
| 28. Participant checking           | Did participants provide feedback on the findings?                                                      | Page 3056                         |
| 29. Quotations presented           | Were participant quotations presented to illustrate the themes/findings? Was each quotation identified? | Pages 3057–3060                   |
| 30. Data and findings consistent   | Was there consistency between the data presented and the findings?                                      | Pages 3057–3060                   |
| 31. Clarity of major themes        | Were major themes clearly presented in the findings?                                                    | Pages 3057–3060, Table 2          |
| 32. Clarity of minor themes        | Is there a description of diverse cases or discussion of minor themes?                                  | Pages 3057–3060                   |

*Note.* The COREQ Checklist is from Tong, A., Sainsbury, P., & Craig, J. (2007). Consolidated criteria for reporting qualitative research (COREQ): A 32-item checklist for interviews and focus groups. *International Journal of Quality in Health Care*, 19(6), 349-357. <https://doi.org/10.1093/intqhc/mzm042>
