# Supplementary material
Source: publisher figshare collection journal article supplement (https://asha.figshare.com/articles/dataset/_/27214407)
Supplement: Supplementary file 3 [file 2]

## **Supplemental Material S2. Research team details.**

The first author conducted all the interviews and participated in thematic analysis and manuscript development. She is a certified and licensed speech-language pathologist who is a tenured academic researcher, holding a PhD degree. Her scholarly, pedagogical, and clinical expertise includes augmentative and alternative communication, scholarship of teaching and learning, and developmental disabilities. She did not work clinically at the time of data collection and analysis. The second author participated in thematic analysis and manuscript development. He is an experienced computer scientist who is a tenure-track academic researcher, holding a PhD degree. His scholarly, pedagogical, and clinical expertise includes quality of healthcare services both within and beyond clinical settings for individuals with chronic conditions, aiming to facilitate independent living, leveraging innovative technologies, including wearables, mobile applications, games, and virtual reality systems. He served as the qualitative research expert in this study.

The third author participated in thematic analysis and manuscript development. She is a certified and licensed speech-language pathologist who is a tenured academic researcher, holding a PhD degree. Her scholarly, pedagogical, and clinical expertise includes reading development, disorders, and learning processes with a primary goal of advancing their literacy and overall learning experiences. She did not work clinically at the time of data collection and analysis. Prior to study commencement, no relationship was established between the first author, the interviewer, and the participants, the interviewees. The participants knew that the first author is a faculty member at West Chester University Speech and Hearing Clinic who specializes in augmentative and alternative communication.
