# Supplementary material
Source: publisher figshare collection journal article supplement (https://asha.figshare.com/articles/dataset/_/27214407)

**Supplemental Material S1.** Example of a coding tree for Theme 3.

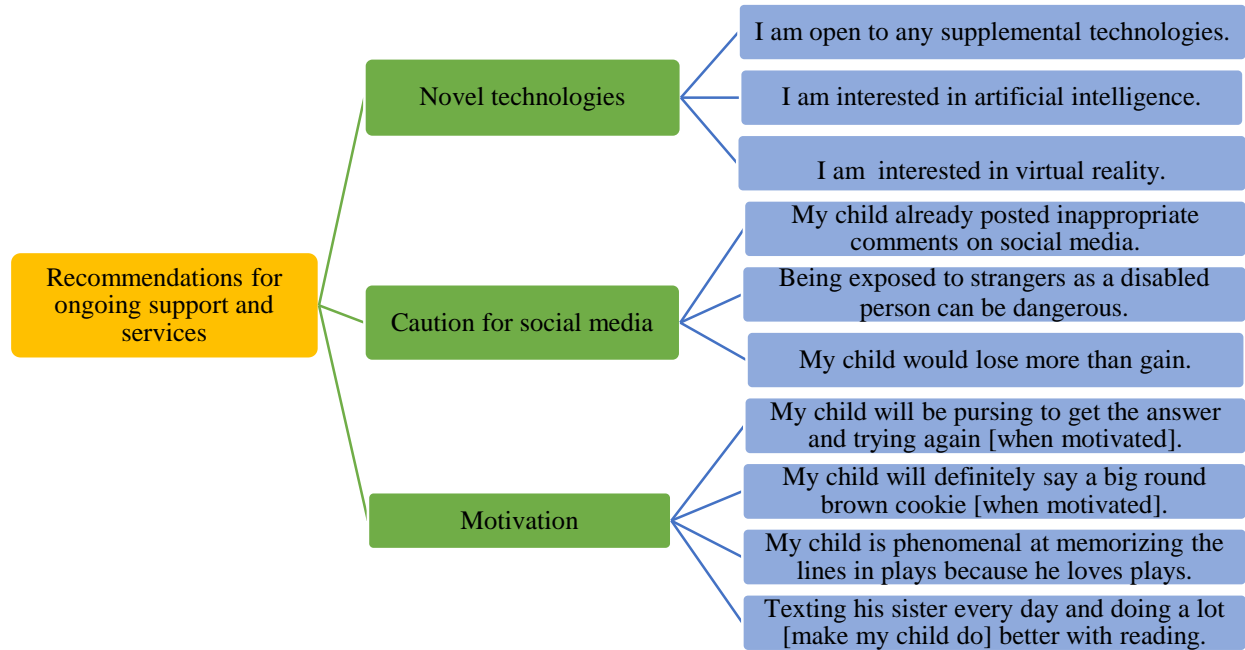

Supplement: Supplementary file 1 [file 2]
